# Supplementary material
Source: publisher site journal article supplement (https://www.dovepress.com/article/246636)
Supplement: Supplementary file 1 [file get_supplementary_file.php]

APPENDIX

# Feasibility study of advanced cardiovascular screening in middle-aged patients with diabetes

**Table A**: HbA1c target

| **Diabetes duration** | **HbA1c target** |
| --- | --- |
| < 10 years | < 48 mmol/mol |
| 11 - 20 years | < 53 mmol/mol |
| > 20 years | < 58 mmol/mol |

**Table B**: Baseline treatment according to CAC score group

|  | **CAC score** | | | |  |
| --- | --- | --- | --- | --- | --- |
|  | **0 AU** | **1-99 AU** | **100-399 AU** | **≥ 400 AU** | **p-value** |
| **Number of participants** | 68 | 51 | 24 | 23 |  |
| **Preventive treatment**   - *Statin* - *Antihypertensive* - *Antithrombotic* | 37 (54%)  34 (50%)  4 (6%) | 32 (63%)  27 (53%)  4 (8%) | 16 (67%)  22 (92%)  5 (21%) | 17 (74%)  19 (83%)  4 (17%) | 0.36  <0.0001  0.10 |
| **Antidiabetic treatment**   - *Non-medical* - *Metformin* - *Insulin* - *SLGT-2i* - *GPL-1a* - *DPP-4i* | 5 (8%)  40 (59%)  24 (35%)  9 (13%)  9 (13%)  6 (9%) | 2 (4%)  39 (76%)  15 (29%)  4 (8%)  1 (2%)  9 (18%) | 0  21 (88%)  7 (29%)  4 (17%)  6 (25%)  4 (17%) | 1 (4%)  19 (83%)  6 (26%)  2 (9%)  5 (22%)  2 (9%) | 0.70  0.02  0.84  0.63  0.006  0.43 |

Numbers are n (%).

Abbreviations: CAC, coronary artery calcification; AU, arbitrary unit.
